# Supplementary material for: Synthesis of butadiene-derived polyolefin graft copolymers and their crystallization behaviors
Source: Royal Society of Chemistry journal article supplement (doi:10.1039/d5py00243e), 2025-01-01
Supplement: d5py00243e1.pdf [file d5py00243e1.pdf]

Electronic Supplementary Information for:

**Synthesis of Butadiene-Derived Polyolefin Graft Copolymers and Their Crystallization Behaviors**

Jin Qian,<sup>a</sup> Zhe Qiang\*<sup>a</sup>

<sup>a</sup>School of Polymer Science and Engineering, The University of Southern Mississippi 118 College Drive, Hattiesburg, MS 39406

\*Corresponding Author (Email: zhe.qiang@usm.edu)

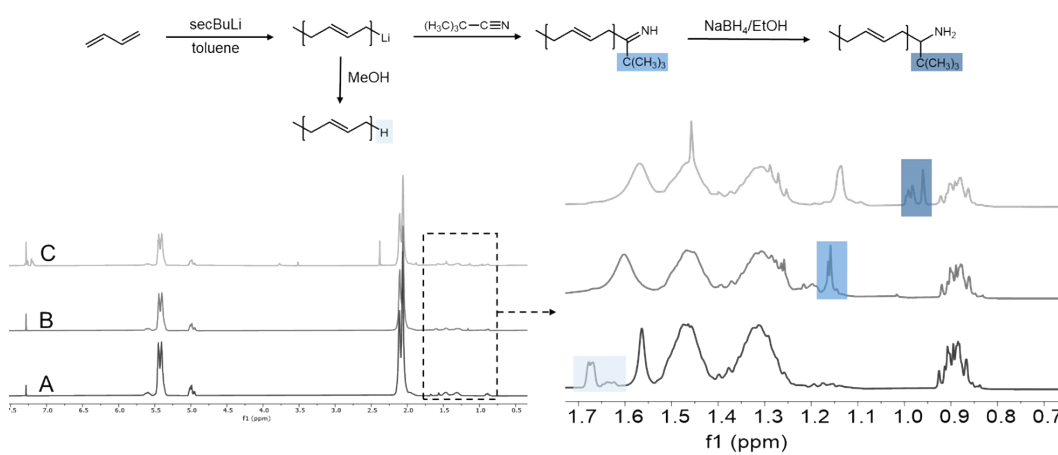

Figure S1. <sup>1</sup>H-NMR spectra in CDCl<sub>3</sub> of (A) unfunctionalized PB, (B) imine-terminated PB and (C) amine-terminated PB.

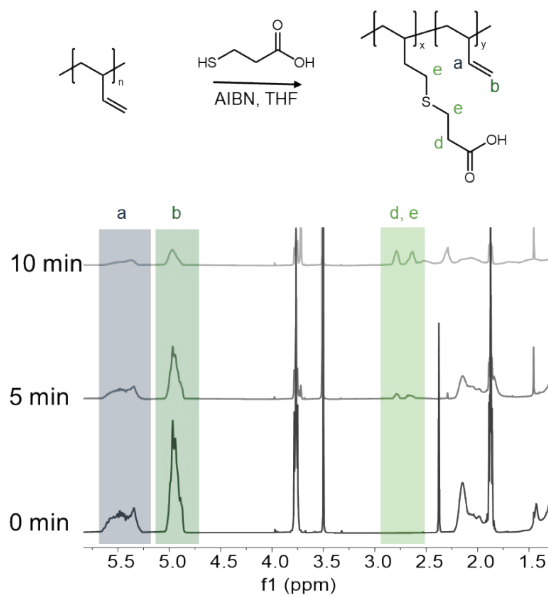

Figure S2. <sup>1</sup>H-NMR spectra in CDCl<sub>3</sub> of 1,2-PB and carboxyl functionalized 1,2-PB at 5 min and 10 min.

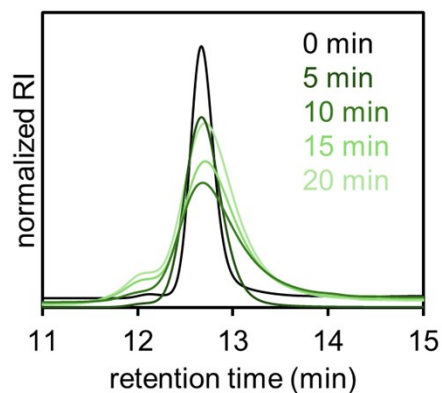

Figure S3. GPC traces of 1,2-PB and carboxyl functionalized 1,2-PB at 5 min, 10 min, 15 min and 20 min.

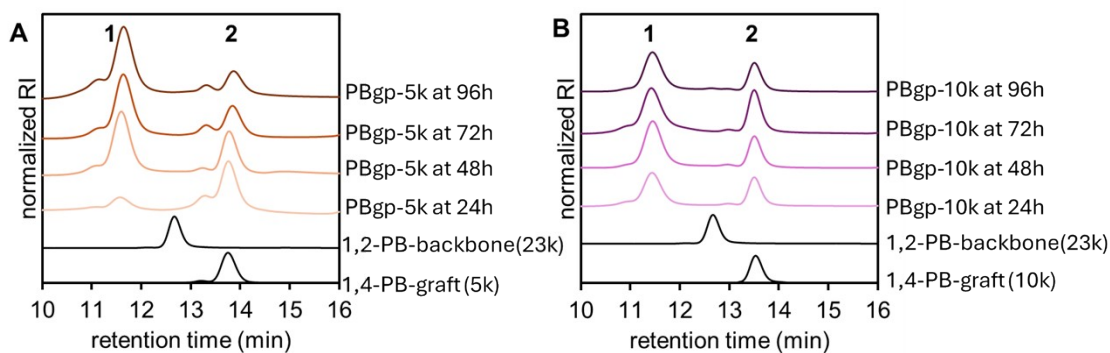

Figure S4. Stacks of GPC traces for the progress of reactions for (A) PBgp-5k and (B) PBgp-10k.

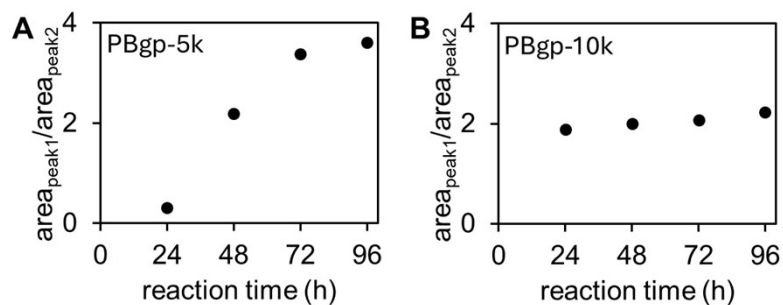

Figure S5. The ratio of peak area for PBgp (peak 1) and graft (peak 2) from the GPC of the crude mixtures of (A) PBgp-5k and (B) PBgp-10k.

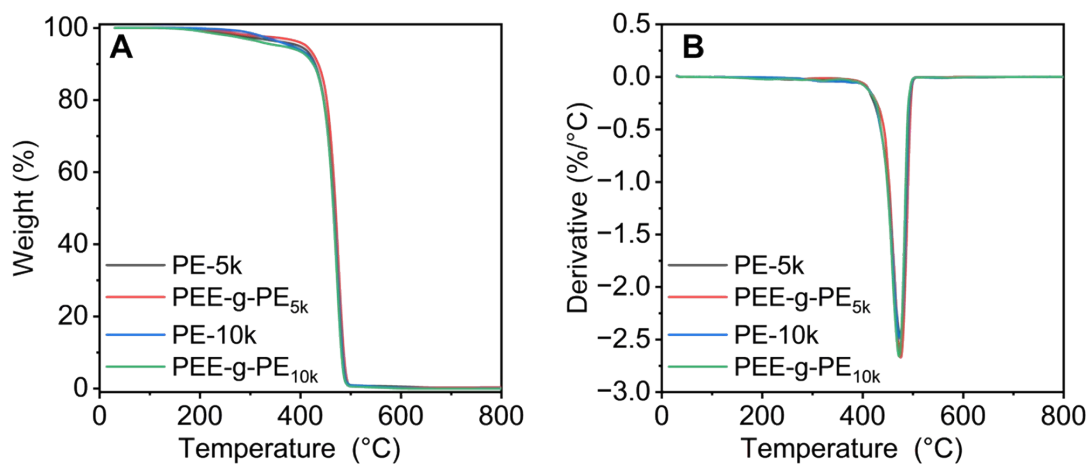

Figure S6. (A) TGA curves in nitrogen and (B) derivative thermogravimetric curve of PE-5k ( $T_{d5}=397$  °C), PEE-g-PE<sub>5k</sub> ( $T_{d5}=380$  °C), PE-10k ( $T_{d5}=396$  °C), and PEE-g-PE<sub>10k</sub> ( $T_{d5}=378$  °C).

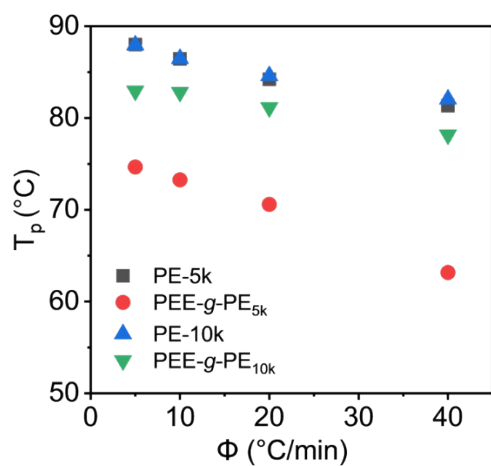

Figure S7.  $T_p$  of PE-5k, PE-10k, PEE-g-PE<sub>5k</sub> and PEE-g-PE<sub>10k</sub> during non-isothermal crystallization as function of cooling rates.

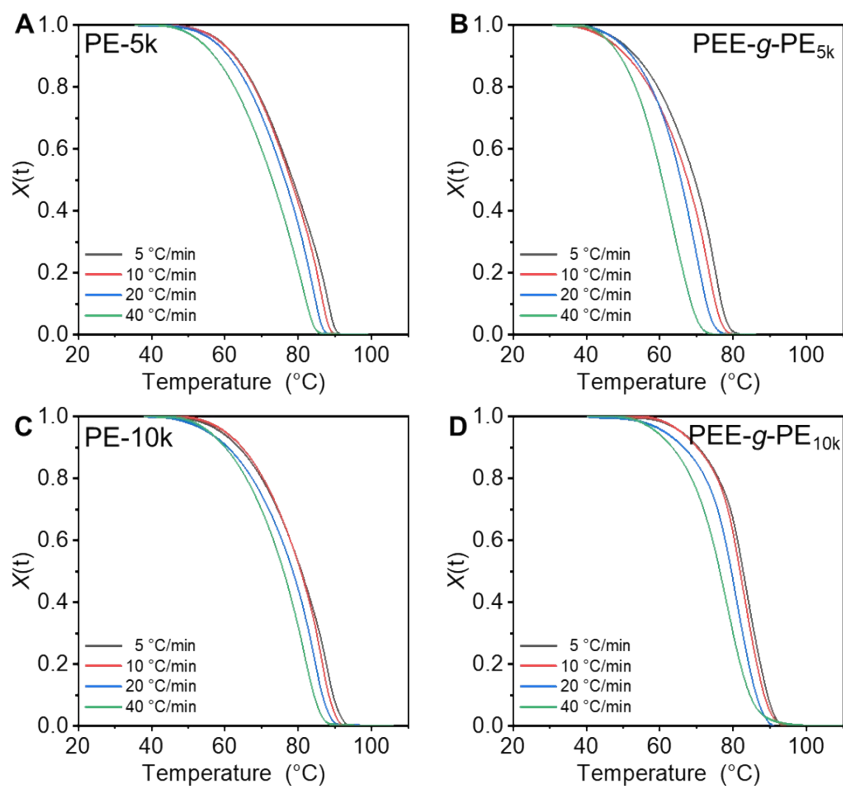

Figure S8. Development of relative crystallinity with temperature for non-isothermal crystallization of for (A) PE-5k, (B) PEE-g-PE<sub>5k</sub>, (C) PE-10k, and (D) PEE-g-PE<sub>10k</sub>.

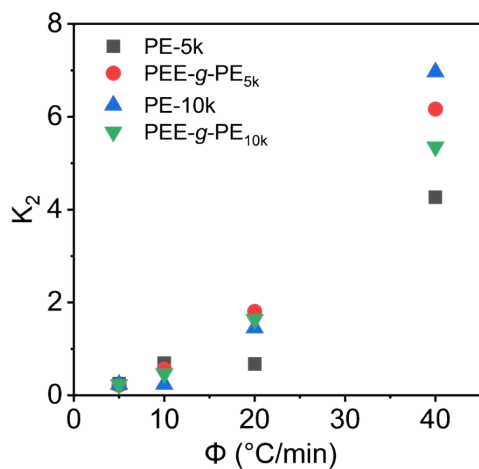

Figure S9. Avrami constant (before Jeziorny modification) for non-isothermal crystallization of PE-5k, PEE-g-PE<sub>5k</sub>, PE-10k, and PEE-g-PE<sub>10k</sub>.

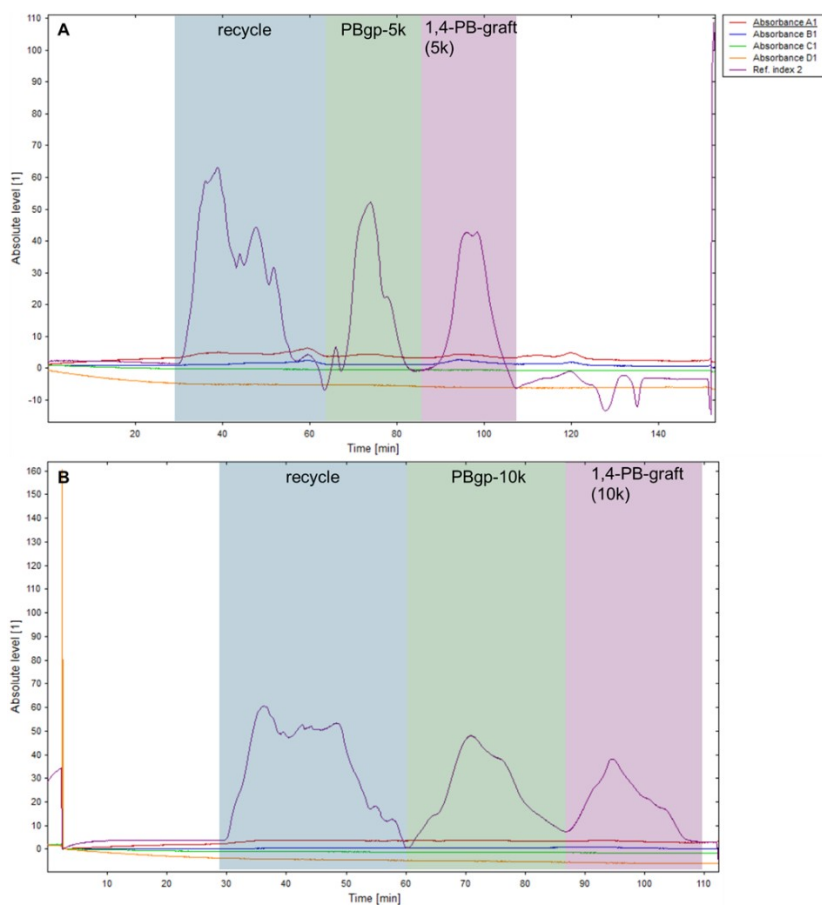

Figure S10. Preparative GPC traces of (A) PBgp-5k and (B) PBgp-10k.

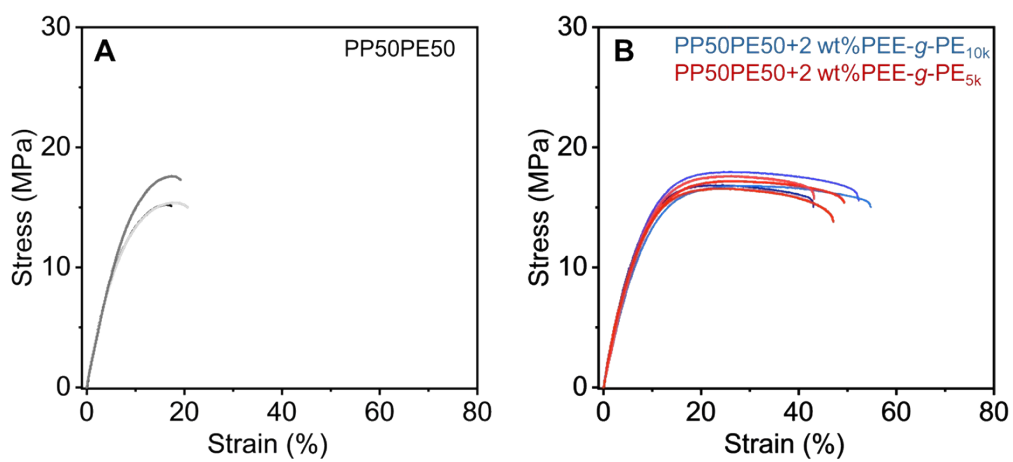

Figure S11. Stress-strain curves performed at 22 mm/min.

Table S1. Characterization data of PBgp-5k, PBgp-10k, 1,2-PB-COOH, 1,2-PB, 1,2-PB-5k and 1,2-PB-10k.

| Polymers    | $M_n^a$<br>(kg/mol) | $\bar{D}^a$ | 1,2R <sup>b</sup> |
|-------------|---------------------|-------------|-------------------|
| PBgp-5k     | 153                 | 1.11        | 0.24              |
| PBgp-10k    | 167                 | 1.43        | 0.21              |
| 1,2-PB-COOH | 43                  | 1.22        | 0.82              |
| 1,2-PB      | 46                  | 1.03        | 0.89              |
| 1,4-PB-5k   | 11                  | 1.08        | 0.12              |
| 1,4-PB-10k  | 22                  | 1.08        | 0.12              |

<sup>a</sup> Measured by GPC in THF at 40 °C with PS standards. <sup>b</sup> The ratio of 1,2-butadiene units was calculated using eq1.

Table S2. Values of  $T_{onset}$ ,  $T_p$ , and  $t_{1/2}$  at various cooling rates ( $\phi$ ) for PEE-g-PE<sub>5k</sub>, PEE-g-PE<sub>10k</sub>, PE-5k and PE-10k.

| Polymers                | $\phi$ (°C /min) | $T_{onset}$ (°C) | $T_p$ (°C) | $t_{1/2}$ (min) |
|-------------------------|------------------|------------------|------------|-----------------|
| PEE-g-PE <sub>5k</sub>  | 5                | 80.1             | 74.7       | 2.1             |
|                         | 10               | 78.6             | 73.3       | 1.1             |
|                         | 20               | 76.3             | 70.6       | 0.5             |
|                         | 40               | 73.0             | 63.2       | 0.3             |
| PEE-g-PE <sub>10k</sub> | 5                | 93.5             | 82.9       | 2.1             |
|                         | 10               | 92.5             | 82.8       | 1.1             |
|                         | 20               | 90.8             | 81.1       | 0.6             |
|                         | 40               | 88.9             | 78.2       | 0.3             |
| PE-5k                   | 5                | 91.1             | 88.0       | 2.5             |
|                         | 10               | 89.6             | 86.4       | 1.2             |
|                         | 20               | 87.9             | 84.2       | 0.6             |
|                         | 40               | 89.6             | 81.3       | 0.4             |
| PE-10k                  | 5                | 92.5             | 87.9       | 2.4             |
|                         | 10               | 92.7             | 86.5       | 1.2             |
|                         | 20               | 90.9             | 84.6       | 0.6             |
|                         | 40               | 88.6             | 82.0       | 0.3             |

Table S3. Elastic modulus, strain at break and toughness of the neat blend (PP50PE50) and the blends of 2 wt% PEE-g-PE graft copolymers.

|                                           | Elastic modulus<br>(MPa) <sup>a</sup> | Strain at break<br>(%) | toughness<br>(MJ/m <sup>3</sup> ) <sup>b</sup> |
|-------------------------------------------|---------------------------------------|------------------------|------------------------------------------------|
| PP50PE50                                  | 147.8 ± 11.7                          | 19.0 ± 1.6             | 2.2 ± 0.3                                      |
| PP50PE50+2 wt%<br>PEE-g-PE <sub>5k</sub>  | 150.4 ± 3.3                           | 46.5 ± 3.1             | 6.8 ± 0.4                                      |
| PP50PE50+2 wt%<br>PEE-g-PE <sub>10k</sub> | 139.6 ± 5.9                           | 50.0 ± 6.2             | 7.5 ± 1.1                                      |

<sup>a</sup> Calculated as the slope of the linear region of the curve prior to yield. <sup>b</sup> Determined by integrating the stress–strain curves for each sample.



The ratio of 1,2-butadiene units ( $1,2R$ ) is calculated as

$$1,2R = \frac{2I_b}{2I_{a,c} + I_b} \quad \text{eq.1}$$

where  $I_b$  and  $I_{a,c}$  are the integration of peak b and peak a,c in Figure 2, respectively.

The graft density ( $G$ ) of -COOH on 1,2-PB-COOH was calculated as:

$$G = \frac{N_{COOH}}{N_{COOH} + N_{butadiene}} = \frac{\frac{I_d + I_e}{6}}{\frac{I_d + I_e}{6} + \frac{2I_a + I_b}{4}} \quad \text{eq.2}$$

where  $N_{COOH}$  and  $N_{butadiene}$  are the number of -COOH and butadiene units;  $I_a$ ,  $I_b$ ,  $I_c$  and  $I_d$  are the integration of peak a, b, c and d in Figure S2, respectively.

The number of graft in the copolymer PBgp is calculated as:

$$1,2R_{gp} = \frac{1,2R_{PB-COOH} \times RU_{PB-COOH} + 1,2R_{graft} \times RU_{graft} \times N}{RU_{PB-COOH} + RU_{graft} \times N} \quad \text{eq.3}$$

where  $1,2R_{gp}$ ,  $1,2R_{PB-COOH}$ , and  $1,2R_{graft}$  are the 1, 2 ratios of the graft polymer PBgp, 1,2-PB-COOH backbone (after thiol-ene reaction), and 1,4-PB-NH<sub>2</sub> graft, respectively;  $RU_{PB-COOH}$  and  $RU_{grafts}$  are the number of butadiene units of 1,2-PB-COOH backbone and 1,4-PB-NH<sub>2</sub> grafts, respectively;  $N$  is the number of grafts per 1,2-PB backbone.

Therefore,

$$\begin{aligned} 1,2R_{gp} &= \frac{1,2R_{PB-COOH} \times \frac{Mn_{1,2-PB}}{MW_{BD}} \times (1 - G) + 1,2R_{graft} \times \frac{Mn_{graft}}{MW_{BD}} \times N}{\frac{Mn_{1,2-PB}}{MW_{BD}} \times (1 - G) + \frac{Mn_{graft}}{MW_{BD}} \times N} \\ &= \frac{1,2R_{PB-COOH} \times Mn_{1,2-PB} \times (1 - G) + 1,2R_{graft} \times Mn_{graft} \times N}{Mn_{1,2-PB} \times (1 - G) + Mn_{graft} \times N} \end{aligned}$$

where  $G$  is the graft density of -COOH on 1,2-PB-COOH obtained from eq.2,  $M_{n,1,2-PB}$  and  $M_{n,graft}$  are the molecular weight of 1,2-PB and 1,4-PB, respectively, and  $MW_{BD}$  is the molecular weight of butadiene.

The number of grafts per 1,2-PB backbone ( $N$ ) can be obtained as:

$$N = \frac{M_{n,1,2-PB} \times (1 - G) \times (1,2R_{PB-COOH} - 1,2R_{gp})}{M_{n,graft} \times (1,2R_{gp} - 1,2R_{graft})} \quad \text{eq.4}$$

In this work,  $M_{n,1,2-PB} = 23,000 \text{ g/mol}$ ,  $G = 0.1$ , and  $M_{n,graft} = 10,000 \text{ g/mol}$  and  $5,000 \text{ g/mol}$  for 1,4-PB-NH<sub>2</sub>-10k and 1,2-PB-NH<sub>2</sub>-5k, respectively.  $1,2R_{gp}$ ,  $1,2R_{PB-COOH}$ , and  $1,2R_{graft}$  were obtained from the <sup>1</sup>H-NMR spectra of PBgp after prepGPC, 1,2-PB-COOH, and 1,2-PB-NH<sub>2</sub> using eq.1.

The weight fraction of the graft in the copolymer PEE-g-PE ( $W_{graft}$ ) is calculated as:

$$W_{graft} = \frac{N \times M_{n,PE}}{N \times M_{n,PE} + M_{n,PEE}} \quad \text{eq.5}$$

where  $N$  is the number of grafts per backbone as calculated by eq.4,  $M_{n,PE}$  and  $M_{n,PEE}$  are the molecular weight of graft and backbone of PEE-g-PE, respectively, which are calculated as:

$$M_{n,PE} = \frac{M_{n,graft}}{54 \text{ g/mol}} \times 56 \text{ g/mol} \quad \text{eq.6}$$

where  $M_{n,graft} = 10,000$  and  $5,000$  for 1,4-PB-NH<sub>2</sub>-10k and 1,2-PB-NH<sub>2</sub>-5k, respectively. 54 g/mol and 56 g/mol are the molecular weight of the repeating unit of PB before and after hydrogenation (the molecular weight of -NH- is neglected).

$$M_{n,PEE} = \frac{M_{n,1,2-PB}}{54 \text{ g/mol}} \times 56 \text{ g/mol} + \frac{M_{n,1,2-PB}}{54 \text{ g/mol}} \times G \times 88 \text{ g/mol} \quad \text{eq.7}$$

where  $M_{n,1,2-PB} = 23,000 \text{ g/mol}$ ,  $G$  is the graft density of -COOH on 1,2-PB-COOH obtained from eq.2, and 88 g/mol is the molecular weight of -SCH<sub>2</sub>CH<sub>2</sub>CO-.
